# Supplementary material for: Low dimensional cyano-bridged heterobimetallic M–FeIII(M = NiII, CuII) complexes constructed from Mer-[FeIII(qcq)(CN)3]−building blocks: syntheses, structures and magnetic properties
Source: Royal Society of Chemistry journal article supplement (doi:10.1039/c3ra45218b), 2013-10-29
Supplement: c3ra45218b.pdf [file c3ra45218b.pdf]

## Electronic supplementary information

### Low Dimensional Cyano-Bridged Heterobimetallic M-Fe<sup>III</sup> (M = Ni<sup>II</sup>, Cu<sup>II</sup>) Complexes Constructed from *Mer*-[Fe<sup>III</sup>(qcq)(CN)<sub>3</sub>]<sup>−</sup> Building Blocks: Syntheses, Structures and Magnetic Properties

Hongbo Zhou,<sup>a</sup> Jiahao Yan,<sup>a</sup> Xiaoping Shen,<sup>\*a</sup> Hu Zhou<sup>b</sup> and Aihua Yuan<sup>b</sup>

<sup>a</sup> School of Chemistry and Chemical Engineering, Jiangsu University, Zhenjiang 212013, China.

Fax: +86-511-8879180; Tel: +86-511-88791800; E-mail: xiaopingshen@163.com.

<sup>b</sup> School of Material Science and Engineering, Jiangsu University of Science and Technology, Zhenjiang 212003, China

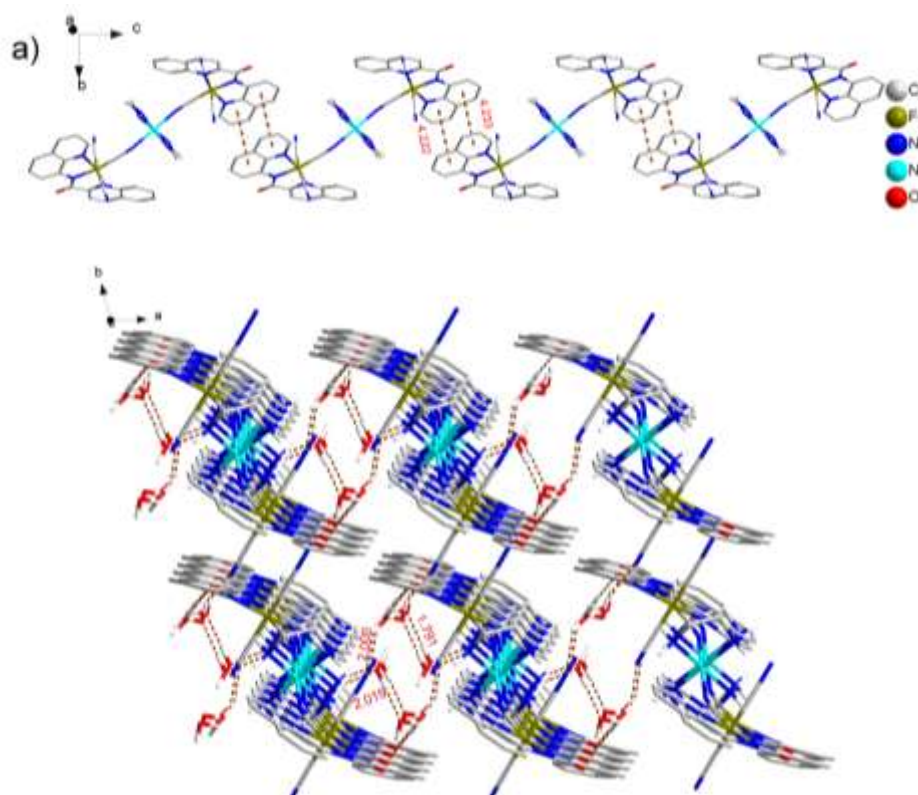

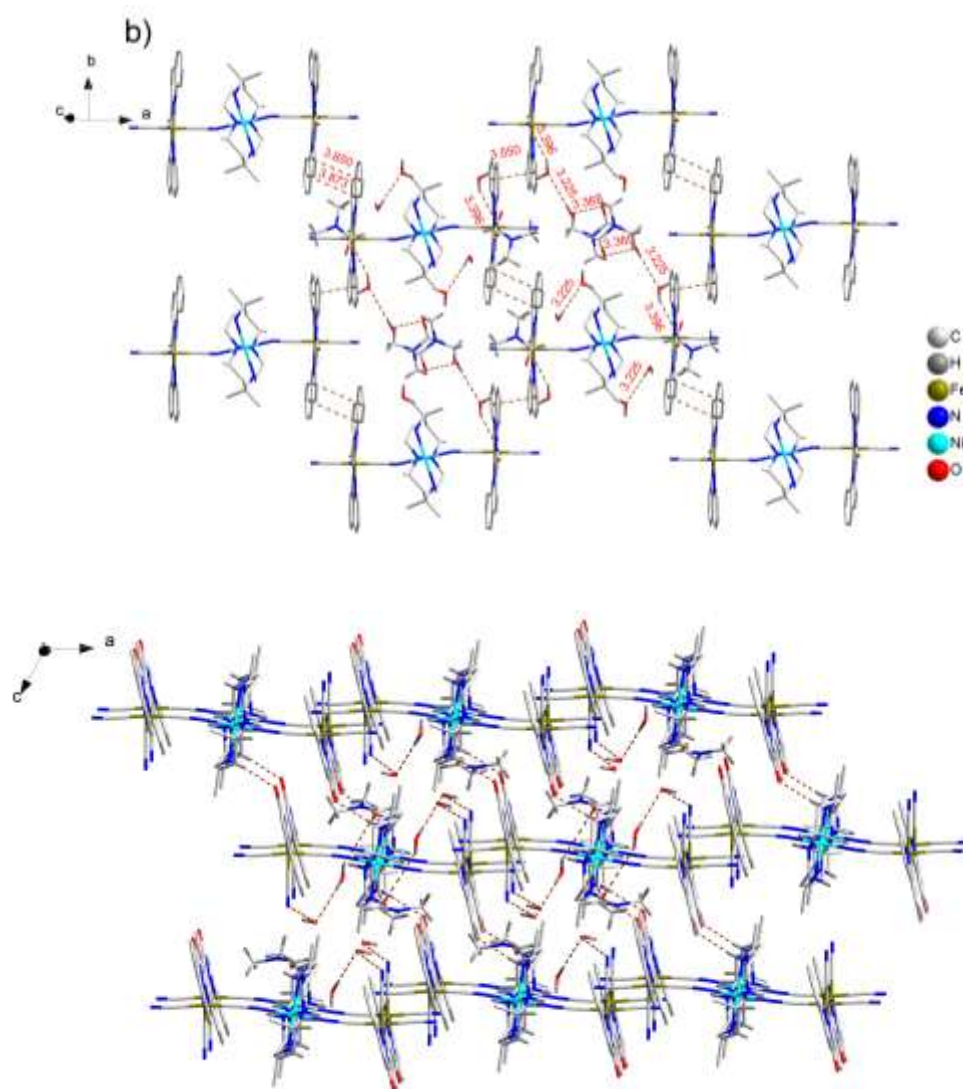

**Figure S1.** The intermolecular  $\pi$ - $\pi$  stacking and hydrogen bonds for **1(a)** and **2(b)**

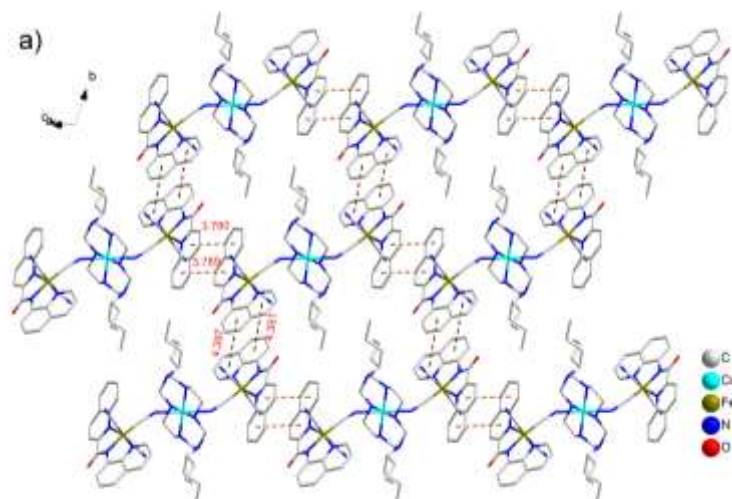

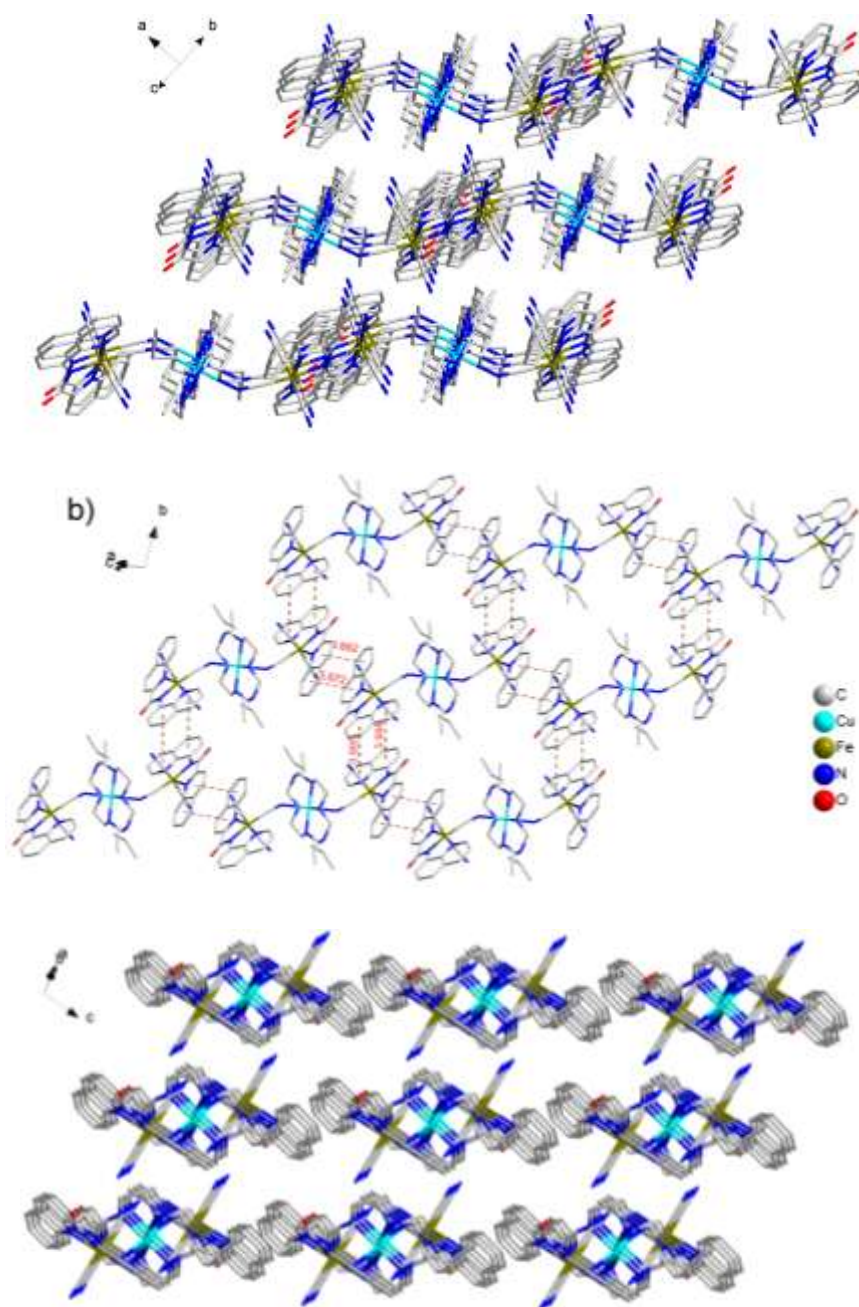

**Figure S2.** The intermolecular  $\pi$ - $\pi$  stacking and hydrogen bonds for **3(a)** and **4(b)**
